# Supplementary material for: Novel EIF2AK4 mutations in histologically proven pulmonary capillary hemangiomatosis and hereditary pulmonary arterial hypertension
Source: Springer Nature journal article supplement (doi:10.1186/s12881-019-0915-7), 2019-11-11
Supplement: MOESM1 [file 17374494]

## Supplementary Figure 1

### Exclusion filters

- 3'and 5' UTR variant,
- downstream gene variant,
- intergenic region,
- Intronic region,
- no-coding exon variant,
- splice acceptor and donor variant,
- splice region variant,
- synonymous variant
- upstream gene variant

- Not Identified by at least two of POLYPHEN, POLYPHEN2 and PROVEAN as disease causing

78K-97K detected variants

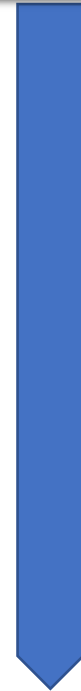

50- 70 filtered variants

### Inclusion filters

- Single nucleotide variants in the coding regions:
    - a- Missense
    - b- Stop codon gained and lost
  - Inframe deletions and insertions
  - Frameshift deletions and Insertions
- 
- Allele frequency (1000GP3\_AF) to < 1%

| Patient | # of SNPs | Missense Var | Stop gained | Stop lost | Frameshift Var | Het/Hom Ratio |
|---------|-----------|--------------|-------------|-----------|----------------|---------------|
| 13.1    | 78,595    | 10,294       | 90          | 38        | 271            | 1.3           |
| 13.2    | 96,911    | 11,274       | 110         | 46        | 333            | 1.5           |
| 14.1    | 81,277    | 10,549       | 94          | 34        | 275            | 1.4           |
| 14.2    | 82,234    | 10,626       | 94          | 35        | 290            | 1.5           |
