# Supplementary material for: Novel EIF2AK4 mutations in histologically proven pulmonary capillary hemangiomatosis and hereditary pulmonary arterial hypertension
Source: Springer Nature journal article supplement (doi:10.1186/s12881-019-0915-7), 2019-11-11
Supplement: MOESM4 [file 17374494]

**Supplementary Table 1: List of Genes Linked to Pulmonary Arterial Hypertension**

|                            |            |          |         |         |        |
|----------------------------|------------|----------|---------|---------|--------|
| PDK4                       | PLOD1      | TGFBR1   | CTGF    | APOE    | ACVRL1 |
| THSD7A                     | HSD17B2    | ENG      | PKD2    | ACE2    | ESR2   |
| PDK2                       | NOX4       | CXCL12   | SPP1    | GDF15   | FBLN5  |
| CCL3                       | HSD17B14   | BMPR1A   | ESRRB   | COL5A1  | IGF1R  |
| TAC1                       | ADAMTS2    | ACTA2    | KCNIP2  | GATA5   | NOL3   |
| TBXA2R                     | MMP2       | SLC6A4   | CRHR1   | HSD17B3 | GATA6  |
| NOS2                       | DNM1L      | CCL2     | DUSP1   | ANO1    | TP53   |
| CELSR3 NCKIPSD SLC<br>26A6 | <i>GP6</i> | HSD17B1  | TEK     | PDHA1   | SMAD4  |
| SS18L2                     | FKBP1A     | PPARGC1A | TNFSF11 | GCH1    | FBXO15 |
| ABHD5                      | F11        | CCND1    | SMAD9   | DNAJB1  | CBLN2  |
| ALOX5                      | PEBP1      | VWF      | TGFBI   | PPARG   | AKT1   |
| HGF                        | TBX5       | TRPV4    | NPPB    | HSD17B7 | RHOB   |
| CPS1                       | NOS1       | CDKN1B   | TBX2    | ERAL1   | MYH15  |
| FHL1                       | PCBP4      | SOD2     | TBX4    | CRP     | AGTR1  |
| HSD17B6                    | ICAM1      | VEGFA    | CCRL2   | CASP9   | TCTA   |
| CD44                       | APOH       | HMGCR    | TNFSF10 | TRPC4   | SRD5A1 |
| CASR                       | ESR1       | SMAD5    | LRP1    | CNDP2   | DYNLT1 |
| TNC                        | MAPK1      | PDGFRB   | IL13RA2 | HSD17B4 | VIP    |
| HSPA5                      | XBP1       | HRG      | EDN3    | PTPN22  | EGFR   |
| MAP4                       | HMOX1      | WNT5A    | PTGIS   | ROCK2   | EBAG9  |
| UTS2                       | PDGFB      | GNAT1    | PGIS    | APLNR   | NOTCH1 |

|          |          |              |         |          |                 |
|----------|----------|--------------|---------|----------|-----------------|
| ELN      | HIF1A    | VIPR1        | PMEPA1  | APLNR    | HSD17B12        |
| CYBA     | MMP9     | IL1A         | WNT1    | PDGFRA   | MMP3            |
| COL11A1  | NFATC2   | ACVR1        | BMP4    | HTR1B    | KLHL1           |
| GUCY1B3  | ANGPT4   | IL18BP PDE1A | C3      | OS9      | CD226           |
| CASP8    | SAMHD1   | PDE1A        | BMP2    | HTR2B    | CNDP1           |
| MYLK     | SMAD7    | IFIH1        | GDF5    | RNASEH2B | EDNRA           |
| RHOA     | XIAP     | RTN4         | ID1     | EDNRB    | PDK1            |
| ROCK1    | CD40LG   | FN1          | CAPNS1  | IL6      | GUCY1A2         |
| PDK3     | TIMP1    | STAT1        | CCR7    | BLK      | BANK1           |
| TGFBR3   | KLF5     | IL1R1        | EDN2    | GATA4    | ANGPT1          |
| PRKACA   | MLYCD    | PROC         | KDR     | PIM1     | PRKCA           |
| HSD17B10 | FOXF1    | ID2          | ADM2    | IRF4     | PDE1C           |
| NFATC3   | ATP8B4   | ANGPTL1      | ADORA2A | TRPC6    | SMAD8           |
| PTGS2    | PDGFRL   | HDAC1        | ATF4    | THBS1    | FBXO32          |
| NOTCH3   | RNASEH2A | LEPR         | IRF5    | CYP19A1  | ERG             |
| TIMM21   | FCER2    | LEPR LEPROT  | GDF2    | BCAR3    | XDH             |
| FOSL2    | TGFB1    | CTH          | EIF2AK4 | CYP1B1   | HK2             |
| NFKB2    | CAV1     | ECE1         | EIF2AK4 | STAT4    | ACE             |
| EDN1     | VIPR2    | TNFSF4       | CCRL1   | BMPR1B   | PTGIR           |
| SENP1    | FKBP14   | MUC5B        | TPH1    | PRDM5    | CBS             |
| CPB2     | SERPINE1 | APOA1        | SHBG    | TRPC3    | ADAR1           |
| ARG2     | MEOX2    | ATF6         | KCNA5   | EGF      | TNFSF12 TNFSF13 |

|          |         |                 |              |          |          |
|----------|---------|-----------------|--------------|----------|----------|
| VANGL1   | LIMK1   | TNFAIP3         | RPL29        | FBN2     | UCN      |
| VCAM1    | DAG1    | MIRLET7A3       | LOC100301990 | SMAD3    | ATP6V0A2 |
| BMP10    | MST1    | MIR21           | PSC          | CTNNB1   | PRKG1    |
| TGFBR2   | LEP     | MIRLET7C        | SCAANT1      | CX3CR1   | ZNF197   |
| TopBP1   | SMAD2   | MIR210          | SLSN3        | HLA-DPB1 | HEXIM1   |
| RYK      | AMIGO3  | MIRLET7F1       | SLI3         | COL3A1   | FAM69C   |
| CCR1     | MTHFR   | MIR30C2         | TDGF1P6      | STAT3    | MAOA     |
| PBRM1    | ARIH2   | MIRLET7D        | DFNA18       | CHST14   | HLA-DRB1 |
| CDC25A   | TSHZ1   | MIRLET7G        | CACNA1C      | IL13     | S100A4   |
| ZNF589   | ZADH2   | MIRLET7A1       | FAUP1        | CXCL10   | ESRRG    |
| DUSP7    | NKX2-6  | BMPR2           | BRCA3        | MAP3K2   | MMP1     |
| GUCY1A3  | TH      | HSD17B8         | DHX9P1       | FOS      | CD47     |
| F2RL1    | F2      | COL5A2          | EEF1A1P3     | SMAD1    | ARHGEF12 |
| SHROOM1  | PRF1    | TNF             | ATXN8        | HSD17B13 | SRC      |
| COL1A2   | UTS2R   | POU5F1          | F5           | HAS2     | SERPINA1 |
| GPBR1    | TMIE    | POU5F1 POU5F1P1 | FRA13B       | APLN     | PDGFA    |
| NOS3     | UBA7    | GNB2L1          | HNRNPA1P11   | LAMB2    | SLC2A10  |
| CFL2     | NKX2-5  | C18orf63        | KCNK3        | NME6     | HES5     |
| SLC39A13 | SCN5A   | HLA-DQB1        | HSCRS2       | PRL      | PCDH20   |
| FBN1     | PROS1   | MIR224          | PPP2R3A      | CXCR6    | HSD17B11 |
| GREM1    | TMEM173 | MIR27A          | NCK1         | CEBPB    | HLA-DRB5 |
| ATXN8OS  | LTBP1   | MIR27B          | MRAS         | CFL1     | RYR2     |

|              |               |           |        |                  |          |
|--------------|---------------|-----------|--------|------------------|----------|
| PSMD10P3     | RASGRP3       | MIRLET7B  | PIK3CB | RNASEH2C         | SMURF1   |
| LOC100529111 | PIBF1         | MIR204    | SPSB4  | ESRRA            | MIRLET7E |
| RPL35AP8     | KCTD12        | MIR328    | RASA2  | MIR17            | PLB1     |
| LOC400655    | EDNRB         | MIR503    | ATP1B3 | LOC100505<br>876 | PPP1CB   |
| LOC100132647 | SPRY2         | MIR130A   | GBE1   | MIR424           | LBH      |
| MIR451A      | COL2A1        | MIRLET7F2 | RAB19  | STGC3            | CAPN13   |
| LOC400657    | CELIAC9       | NCKIPSD   | GPR113 | ZNF469           | NLRC4    |
| MIR145       | MIRLET7A<br>2 | TREX1     |        |                  |          |
