# Supplementary material for: Novel EIF2AK4 mutations in histologically proven pulmonary capillary hemangiomatosis and hereditary pulmonary arterial hypertension
Source: Springer Nature journal article supplement (doi:10.1186/s12881-019-0915-7), 2019-11-11
Supplement: MOESM5 [file 17374494]

**Supplementary Table 1:** Variants in the coding regions of the *EIF2AK1-4* genes in Individulas AII.1 and AII.2 (excluding synonymous variants)

| SAMPLE ID | #CHROM | POS        | REF    | ALT | Zygoty | Effect                               | Putative_Impact | Gene_Name | Feature_ID     | Transcript_BioType | HGVS.p      | dbSNP142_ID | 1000Gp3_AF | ESP6500_MAF_ALL |
|-----------|--------|------------|--------|-----|--------|--------------------------------------|-----------------|-----------|----------------|--------------------|-------------|-------------|------------|-----------------|
| AII.2     | chr15  | 40,246,148 | TAAAAG | T   | HOM    | frameshift_variant                   | HIGH            | EIF2AK4   | NM_001013703.3 | Coding             | p.Lys187fs  | .           | .          | .               |
| AII.1     | chr15  | 40,246,148 | TAAAAG | T   | HOM    | frameshift_variant                   | HIGH            | EIF2AK4   | NM_001013703.3 | Coding             | p.Lys187fs  | .           | .          | .               |
| AII.2     | chr15  | 40,265,799 | A      | G   | HOM    | missense_variant                     | MODERATE        | EIF2AK4   | NM_001013703.3 | Coding             | p.Glu556Gly | rs2307105   | 0.844449   | A:0.057330      |
| AII.1     | chr15  | 40,265,799 | A      | G   | HOM    | missense_variant                     | MODERATE        | EIF2AK4   | NM_001013703.3 | Coding             | p.Glu556Gly | rs2307105   | 0.844449   | A:0.057330      |
| AII.2     | chr15  | 40,269,052 | G      | A   | HOM    | splice_region_variant&intron_variant | LOW             | EIF2AK4   | NM_001013703.3 | Coding             | .           | rs34298786  | 0.287141   | A:0.336137      |
| AII.1     | chr15  | 40,269,052 | G      | A   | HOM    | splice_region_variant&intron_variant | LOW             | EIF2AK4   | NM_001013703.3 | Coding             | .           | rs34298786  | 0.287141   | A:0.336137      |
| AII.2     | chr15  | 40,322,552 | G      | T   | HOM    | splice_region_variant&intron_variant | LOW             | EIF2AK4   | NM_001013703.3 | Coding             | .           | rs2250402   | 0.905551   | G:0.069694      |
| AII.1     | chr15  | 40,322,552 | G      | T   | HOM    | splice_region_variant&intron_variant | LOW             | EIF2AK4   | NM_001013703.3 | Coding             | .           | rs2250402   | 0.905551   | G:0.069694      |
| AII.2     | chr7   | 6,080,853  | GA     | G   | HET    | splice_region_variant&intron_variant | LOW             | EIF2AK1   | NM_014413.3    | Coding             | .           | rs34743814  | .          | .               |
| AII.1     | chr7   | 6,080,853  | GA     | G   | HOM    | splice_region_variant&intron_variant | LOW             | EIF2AK1   | NM_014413.3    | Coding             | .           | rs34743814  | .          | .               |
| AII.2     | chr2   | 88,874,891 | C      | A   | HET    | missense_variant                     | MODERATE        | EIF2AK3   | NM_004836.5    | Coding             | p.Ala704Ser | rs1805165   | 0.720647   | C:0.198293      |
| AII.1     | chr2   | 88,874,891 | C      | A   | HET    | missense_variant                     | MODERATE        | EIF2AK3   | NM_004836.5    | Coding             | p.Ala704Ser | rs1805165   | 0.720647   | C:0.198293      |
| AII.2     | chr2   | 88,895,123 | T      | C   | HET    | missense_variant                     | MODERATE        | EIF2AK3   | NM_004836.5    | Coding             | p.Gln166Arg | rs13045     | 0.648962   | T:0.265262      |
| AII.1     | chr2   | 88,895,123 | T      | C   | HET    | missense_variant                     | MODERATE        | EIF2AK3   | NM_004836.5    | Coding             | p.Gln166Arg | rs13045     | 0.648962   | T:0.265262      |
| AII.2     | chr2   | 88,913,273 | G      | C   | HET    | missense_variant                     | MODERATE        | EIF2AK3   | NM_004836.5    | Coding             | p.Ser136Cys | rs867529    | 0.280551   | C:0.198370      |
| AII.1     | chr2   | 88,913,273 | G      | C   | HET    | missense_variant                     | MODERATE        | EIF2AK3   | NM_004836.5    | Coding             | p.Ser136Cys | rs867529    | 0.280551   | C:0.198370      |
| AII.2     | chr2   | 88,926,729 | CCAG   | C   | HOM    | inframe_deletion                     | MODERATE        | EIF2AK3   | NM_004836.5    | Coding             | p.Leu21del  | rs144052332 | 0.796526   | .               |
| AII.1     | chr2   | 88,926,729 | CCAG   | C   | HOM    | inframe_deletion                     | MODERATE        | EIF2AK3   | NM_004836.5    | Coding             | p.Leu21del  | rs144052332 | 0.796526   | .               |
