# Supplementary material for: Novel EIF2AK4 mutations in histologically proven pulmonary capillary hemangiomatosis and hereditary pulmonary arterial hypertension
Source: Springer Nature journal article supplement (doi:10.1186/s12881-019-0915-7), 2019-11-11
Supplement: MOESM6 [file 17374494]

**Supplementary Table 2:** Variants in the coding regions of the *EIF2AK4* gene network in Individulas AII.1 and AII.2 (excluding synonymous variants)

| SAMPLE ID | #CHROM | POS         | Zygoty | FILTER | Effect                                 | Putative_Impact | Gene_Name | Feature_ID  | Transcript_BioType | HGVS.p       | dbSNP142_ID | 1000Gp3_AF  | ESP6500_MAF_ALL |
|-----------|--------|-------------|--------|--------|----------------------------------------|-----------------|-----------|-------------|--------------------|--------------|-------------|-------------|-----------------|
| AII.2     | chr12  | 120,575,549 | HOM    | PASS   | missense_variant                       | MODERATE        | GCN1L1    | NM_006836.1 | Coding             | p.Tyr2155Asp | rs3864938   | 0.999401    | A:0.002197      |
| AII.2     | chr12  | 120,600,770 | HET    | PASS   | missense_variant                       | MODERATE        | GCN1L1    | NM_006836.1 | Coding             | p.Val682Met  | .           | .           | .               |
| AII.2     | chr22  | 39,917,515  | HET    | PASS   | missense_variant                       | MODERATE        | ATF4      | NM_001675.4 | Coding             | p.Gln22Pro   | rs4894      | 0.273762    | C:0.302245      |
| AII.2     | chr17  | 59,544,863  | HOM    | PASS   | splice_region_variant&intron_variant   | LOW             | TBX4      | NM_018488.2 | Coding             | .            | rs758596    | 0.347843    | A:0.314701      |
| AII.2     | chr3   | 150,280,445 | HOM    | PASS   | missense_variant&splice_region_variant | MODERATE        | EIF2A     | NM_032025.3 | Coding             | p.Thr97Ser   | rs1132979   | 0.354233    | G:0.292945      |
| AII.2     | chr3   | 150,281,340 | HET    | PASS   | missense_variant                       | MODERATE        | EIF2A     | NM_032025.3 | Coding             | p.Leu111Phe  | rs181238642 | 0.000599042 | T:0.000431      |
| AII.1     | chr3   | 150,280,445 | HOM    | PASS   | missense_variant&splice_region_variant | MODERATE        | EIF2A     | NM_032025.3 | Coding             | p.Thr97Ser   | rs1132979   | 0.354233    | G:0.292945      |
| AII.1     | chr3   | 150,281,340 | HET    | PASS   | missense_variant                       | MODERATE        | EIF2A     | NM_032025.3 | Coding             | p.Leu111Phe  | rs181238642 | 0.000599042 | T:0.000431      |
| AII.1     | chr17  | 59,544,863  | HET    | PASS   | splice_region_variant&intron_variant   | LOW             | TBX4      | NM_018488.2 | Coding             | .            | rs758596    | 0.347843    | A:0.314701      |
| AII.1     | chr12  | 120,575,549 | HOM    | PASS   | missense_variant                       | MODERATE        | GCN1L1    | NM_006836.1 | Coding             | p.Tyr2155Asp | rs3864938   | 0.999401    | A:0.002197      |
